# Supplementary material for: A Retrospective Study of Clinical and Histopathological Features of 81 Cases of Canine Apocrine Gland Adenocarcinoma of the Anal Sac: Independent Clinical and Histopathological Risk Factors Associated with Outcome
Source: MDPI journal article supplement (doi:10.3390/ani11113327), 2021-11-22
Supplement: s1 [file s1]

## SUPPLEMENTARY MATERIALS

**TABLE S1. Model generation for the effect of clinical variables on survival stratified by clinical stage.**

| Parameter          | Groups                                    | No.                    | MST<br>†                  | 95%CI‡                              | Global model<br>Strata = Clinical stage |       |                     |       | Optimised model<br>Strata = Clinical stage |       |                     |         |
|--------------------|-------------------------------------------|------------------------|---------------------------|-------------------------------------|-----------------------------------------|-------|---------------------|-------|--------------------------------------------|-------|---------------------|---------|
|                    |                                           |                        |                           |                                     | B§¶                                     | HR«   | 95%CI               | p¶    | B§¶                                        | HR«   | 95%CI               | p»      |
| Tumour size        | ≤2 cm<br><br>>2 cm                        | 35<br><br>42           | 678<br><br>360            | 336–<br><br>1020<br><br>241–479     | 0.649                                   | 1.914 | 0.952–<br><br>3.849 | 0.091 | 0.675                                      | 1.963 | 1.013–<br><br>3.806 | 0.048*  |
| Lymph node<br>size | ≤1.6 cm<br><br>>1.6–≤5<br>cm<br><br>>5 cm | 39<br><br>24<br><br>18 | 631<br><br>493<br><br>135 | 312–950<br><br>442–544<br><br>8–258 | 1.058                                   | 2.879 | 1.549–<br><br>5.352 | 0.001 | 1.116                                      | 3.053 | 1.712–<br><br>5.446 | 0.001** |
| Surgery            | No<br><br>Yes                             | 18<br><br>63           | 137<br><br>531            | 0–528<br><br>389–673                | -1.023                                  | 0.359 | 0.166–<br><br>0.776 | 0.025 | -1.103                                     | 0.332 | 0.161–<br><br>0.685 | 0.004** |
| Radiotherapy       | No<br><br>yes                             | 73<br><br>8            | 452<br><br>995            | 378–526<br><br>686–1304             | -1.208                                  | 0.299 | 0.092–<br><br>0.967 | 0.018 | -1.18                                      | 0.307 | 0.099–<br><br>0.949 | 0.014*  |
| Medical<br>therapy | No<br><br>Yes                             | 49<br><br>32           | 452<br><br>461            | 324–580<br><br>416–506              | -0.043                                  | 0.958 | 0.503–<br><br>1.823 | 0.906 | eliminated                                 |       |                     |         |
| Calcium status     | Normal<br><br>Increased                   | 58<br><br>19           | 497<br><br>286            | 412–582<br><br>145–427              | 0.341                                   | 1.406 | 0.642–<br><br>3.079 | 0.482 | eliminated                                 |       |                     |         |

†Median survival time.

‡95% confidence interval.

§B coefficient of Cox regression.

¶Unless otherwise noted, bootstrap results are based on 1000 bootstrap samples.

«Hazard ratio.

»based on 999 bootstrap samples.

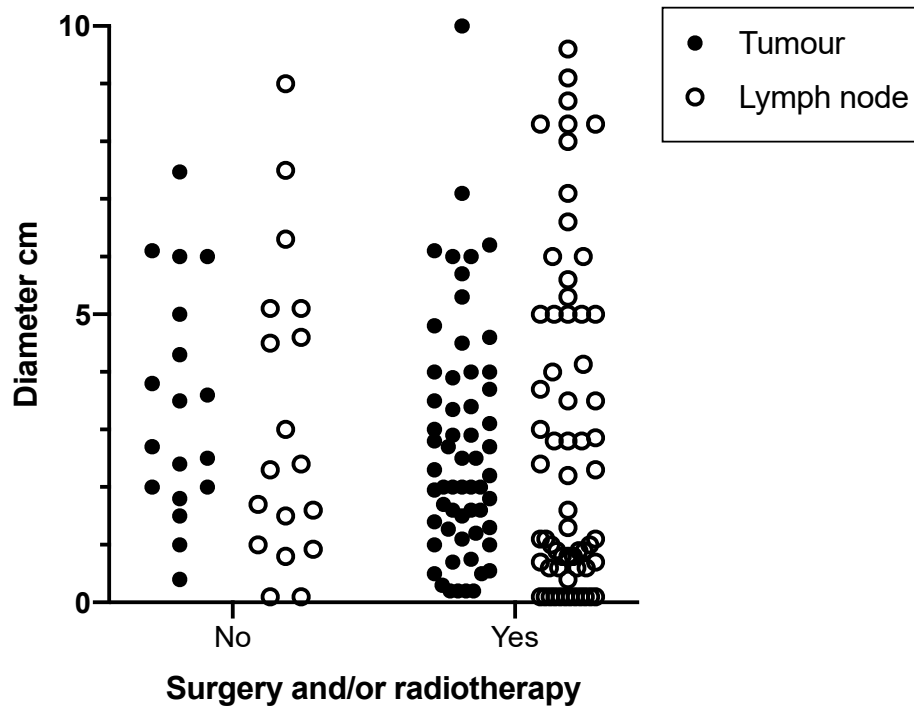

**FIGURE S1. Tumour and lymph node size stratified by treatment received.**

**TABLE S2. Log-rank and Cox univariate analysis of the clinical algorithm for survival.**

| Score | Number | MST† | 95%CI‡   | Log-rank<br>p  | B§¶   | HR«  | 95%CI‡     | Cox p¶  |
|-------|--------|------|----------|----------------|-------|------|------------|---------|
| 0     | 15     | 1072 | 668–1476 | <0.0001<br>*** | 1.351 | 3.86 | 2.368–6.29 | 0.001** |
| 1     | 29     | 590  | 372–808  |                |       |      |            |         |

|              |    |     |        |  |  |  |  |  |
|--------------|----|-----|--------|--|--|--|--|--|
| 2 or<br>more | 35 | 237 | 22–452 |  |  |  |  |  |
|--------------|----|-----|--------|--|--|--|--|--|

†Median survival time.

‡95% confidence interval.

§B coefficient of Cox regression.

¶Unless otherwise noted, bootstrap results are based on 1000 bootstrap samples.

«Hazard ratio.

**TABLE S3. Model generation for the effect of clinical variables on progression-free interval.**

| Parameter             | Groups    | No. | MPFI<br>† | 95%CI ‡ | Global model |       |            |       | Optimised model |       |            |       |
|-----------------------|-----------|-----|-----------|---------|--------------|-------|------------|-------|-----------------|-------|------------|-------|
|                       |           |     |           |         | B§¶          | HR«   | 95%CI<br>‡ | p¶    | B§¶             | HR«   | 95%CI<br>‡ | p<    |
| Tumour size           | ≤1.3 cm   | 9   | 445       | 188–702 | 1.947        | 7.008 | 2.25–      | 0.006 | 1.783           | 5.948 | 2.062–     | 0.006 |
|                       | >1.3 cm   | 26  | 230       | 164–296 |              |       | 21.826     |       |                 |       | 17.161     | **    |
| Distant<br>metastasis | No »      | 29  | 252       | 223–281 | 1.578        | 4.844 | 1.773–     | 0.002 | 1.742           | 5.708 | 2.093–     | 0.001 |
|                       | Yes       | 8   | 133       | 23–243  |              |       | 13.236     |       |                 |       | 15.567     | **    |
| Lymph node size       | ≤3.8 cm   | 27  | 230       | 223–281 | -0.763       | 0.466 | 0.173–     | 0.123 | -0.954          | 0.385 | 0.155–     | 0.053 |
|                       | >3.8 cm   | 10  | 258       | 23–243  |              |       | 1.259      |       |                 |       | 0.96       |       |
| Calcium status        | Normal    | 26  | 239       | 224–254 | -0.525       | 0.592 | 0.203–     | 0.338 |                 |       |            |       |
|                       | Increased | 8   | 275       | 174–376 |              |       | 1.723      |       |                 |       |            |       |

†Median first progression-free interval

‡95% confidence interval.

§B coefficient of Cox regression.

¶Unless otherwise noted, bootstrap results are based on 1000 bootstrap samples.

«Hazard ratio.

»Locoregional spread or primary disease only.

‹Based on 998 samples.

**FIGURE S2. (a) Ki67% positive cells of primary AGASAC tumours from 46 dogs. (b)**

**Relationship between the Ki67% and mitotic count of individual primary tumours.**

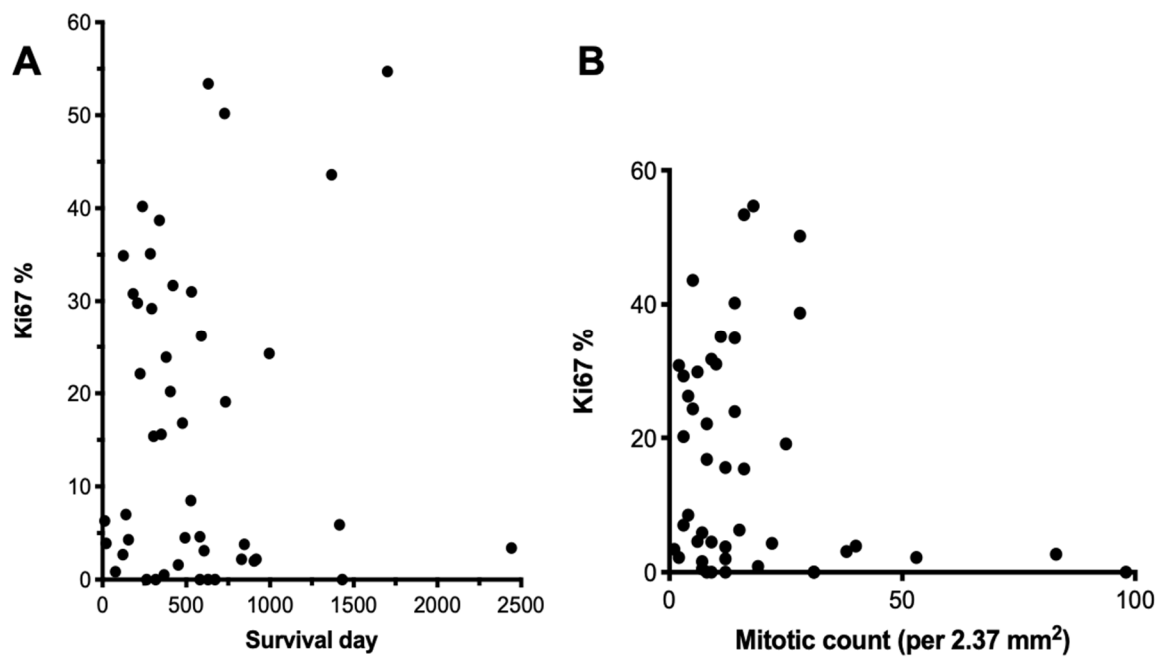

**TABLE S4. Model generation for histological variables effect upon survival.**

| Parameter | Groups  | No. | MST<br>† | 95%CI‡   | Global model |       |                 |       | Optimised model |       |                 |         |
|-----------|---------|-----|----------|----------|--------------|-------|-----------------|-------|-----------------|-------|-----------------|---------|
|           |         |     |          |          | B§¶          | HR«   | 95%CI<br>‡      | p¶    | B§¶             | HR«   | 95%CI‡          | p¶      |
| Necrosis  | None    | 28  | 831      | 498–1163 | 1.094        | 2.987 | 1.291–<br>6.913 | 0.014 | 1.093           | 2.984 | 1.336–<br>6.662 | 0.008** |
|           | Present | 21  | 421      | 268–574  |              |       |                 |       |                 |       |                 |         |

|                                  |           |    |     |          |       |       |        |       |            |       |        |        |
|----------------------------------|-----------|----|-----|----------|-------|-------|--------|-------|------------|-------|--------|--------|
| Predominant histological pattern | Non-solid | 26 | 631 | 85–1177  | 0.986 | 2.68  | 1.177– | 0.068 | 0.967      | 2.63  | 1.194– | 0.016* |
|                                  | Solid     | 23 | 452 | 179–725  |       |       | 6.103  |       |            |       | 5.793  |        |
| Vascular invasion                | None      | 31 | 831 | 433–1229 | 1.252 | 3.497 | 1.408– | 0.011 | 1.027      | 2.794 | 1.251– | 0.012* |
|                                  | Present   | 18 | 367 | 233–501  |       |       | 8.683  |       |            |       | 6.242  |        |
| Ki67%                            | ≤6.1      | 21 | 607 | 178–1036 | 0.382 | 1.465 | 0.623– | 0.445 | eliminated |       |        |        |
|                                  | >6.1      | 25 | 590 | 419–761  |       |       | 3.443  |       |            |       |        |        |

†Median survival time.

‡95% confidence interval.

§B coefficient of Cox regression.

¶Unless otherwise noted, bootstrap results are based on 1000 bootstrap samples.

«Hazard ratio.

**TABLE S5. Log-rank and Cox univariate analysis of the histopathological prognostic algorithm.**

| Score           | No. | MST<br>† | 95%CI‡   | Log-rank<br>p   | B§¶   | HR«   | 95%CI‡       | Cox p¶  |
|-----------------|-----|----------|----------|-----------------|-------|-------|--------------|---------|
| Score 0–1       | 29  | 906      | 374–1438 | <0.0001<br>**** | 1.567 | 4.792 | 2.127–10.796 | 0.001** |
| Score 2 or more | 20  | 318      | 224–412  |                 |       |       |              |         |

†Median survival time.

‡95% confidence interval.

§B coefficient of Cox regression.

¶Unless otherwise noted, bootstrap results are based on 1000 bootstrap samples.

«Hazard ratio.
